# Supplementary material for: Unveiling the effects of A-site substitutions on the oxygen ion migration in A2−xA′xNiO4+δ by first principles calculations
Source: Royal Society of Chemistry journal article supplement (doi:10.1039/c8cp04392b), 2018-01-01
Supplement: c8cp04392b1.pdf [file c8cp04392b1.pdf]

# Unveiling the effects of A-site substitutions on the oxygen ions migration in $A_{2-x}A'_xNiO_{4+\delta}$ by first principles calculations

Zhihong Du<sup>1,2,3</sup>, Zijia Zhang<sup>1,2</sup>, Anna Niemczyk<sup>2</sup>, Anna Olszewska<sup>2</sup>, Konrad Świerczek<sup>2,4\*</sup>, Hailei Zhao<sup>1,3\*\*</sup>

<sup>1</sup>University of Science and Technology Beijing, School of Materials Science and Engineering, Beijing 100083, China

<sup>2</sup>AGH University of Science and Technology, Faculty of Energy and Fuels, al. A. Mickiewicza 30, 30-059 Krakow, Poland

<sup>3</sup>Beijing Munciple Key Lab for Advanced Energy Materials and Technologies, Beijing 100083, China

<sup>4</sup>AGH Centre of Energy, AGH University of Science and Technology, ul. Czarnowiejska 36, 30-054 Krakow, Poland

\*xi@agh.edu.pl

\*\*hlzhao@ustb.edu.cn

## Supporting Information

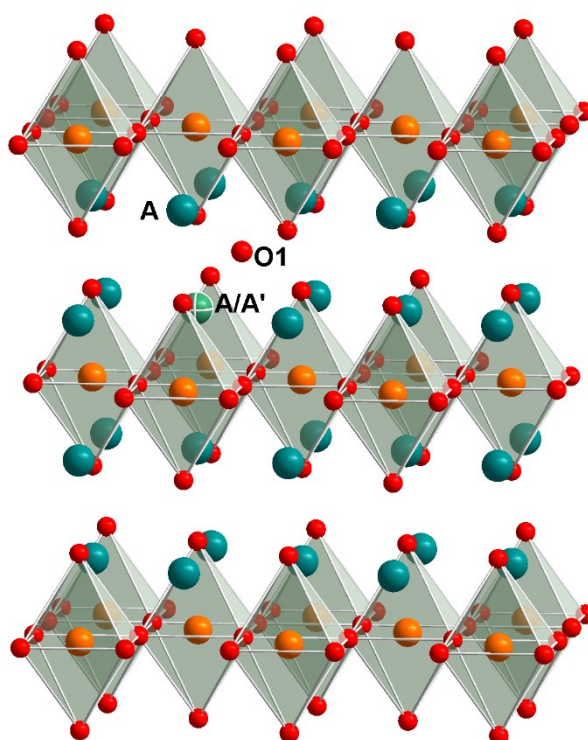

Figure S1.  $2\sqrt{2}\times\sqrt{2}\times 1$  supercell with 16(A,A'), 8Ni, 32O atoms for  $A_{2-x}A'_xNiO_{4+\delta}$  ( $\delta = 0.125$ )

Table S1. Calculated formation energy of the interstitial oxygen in  $A_{2-x}A'_xNiO_{4+\delta}$  (A = La, Pr,

Nd, Sm; A' = Ba, Sr, Ca;  $x = 0$  and  $0.25$ ;  $\delta = 0.125, 0.25$  and  $0.5$ ). \*For this value, experimental parameters ( $a = b = \sqrt{2} \times 3.8642 \text{ \AA}$ ,  $c = 12.6869 \text{ \AA}$ ) were used in the calculations.

| composition                                               | formation energy at O1 / eV | formation energy at O5 / eV |
|-----------------------------------------------------------|-----------------------------|-----------------------------|
| La <sub>2</sub> NiO <sub>4.125</sub>                      | -4.43                       | —                           |
| La <sub>2</sub> NiO <sub>4.25</sub>                       | -4.07                       | —                           |
| La <sub>2</sub> NiO <sub>4.5</sub>                        | -1.46                       | —                           |
| La <sub>2</sub> NiO <sub>4.125</sub> *                    | -4.94                       | —                           |
| La <sub>2</sub> NiO <sub>4.25</sub> *                     | -4.41                       | —                           |
| La <sub>1.75</sub> Ba <sub>0.25</sub> NiO <sub>4.25</sub> | -3.49                       | -3.74                       |
| La <sub>1.75</sub> Sr <sub>0.25</sub> NiO <sub>4.25</sub> | -3.45                       | -3.82                       |
| La <sub>1.75</sub> Ca <sub>0.25</sub> NiO <sub>4.25</sub> | -3.57                       | -3.93                       |
| Pr <sub>2</sub> NiO <sub>4.25</sub>                       | -4.81                       | —                           |
| Nd <sub>2</sub> NiO <sub>4.25</sub>                       | -4.61                       | —                           |
| Sm <sub>2</sub> NiO <sub>4.25</sub>                       | -4.24                       | —                           |
